# Supplementary material for: Eco-inspired synthesis of a melamine formaldehyde-reinforced onion peel biochar/alginate composite for efficient lead ion removal from wastewater
Source: Royal Society of Chemistry journal article supplement (doi:10.1039/d5ma01050k), 2026-01-01
Supplement: d5ma01050k1.pdf [file d5ma01050k1.pdf]

# Eco-inspired synthesis of a melamine formaldehyde-reinforced onion peel biochar/alginate composite for efficient lead ions removal from wastewater

Sarah A. Felemban<sup>1\*</sup> and Alaa O. Baryyan<sup>2</sup>

<sup>1</sup> Department of Chemistry, Faculty of Science, Umm Al-Qura University, 21955 Makkah, Saudi Arabia

<sup>2</sup> Department of Pharmaceutical Sciences, Faculty of Pharmacy, Umm Al-Qura University, 21955 Makkah, Saudi Arabia

\* Corresponding author: safelemban@uqu.edu.sa

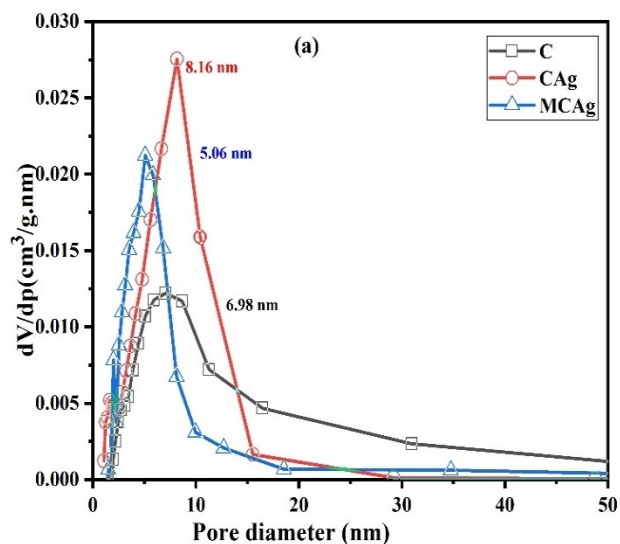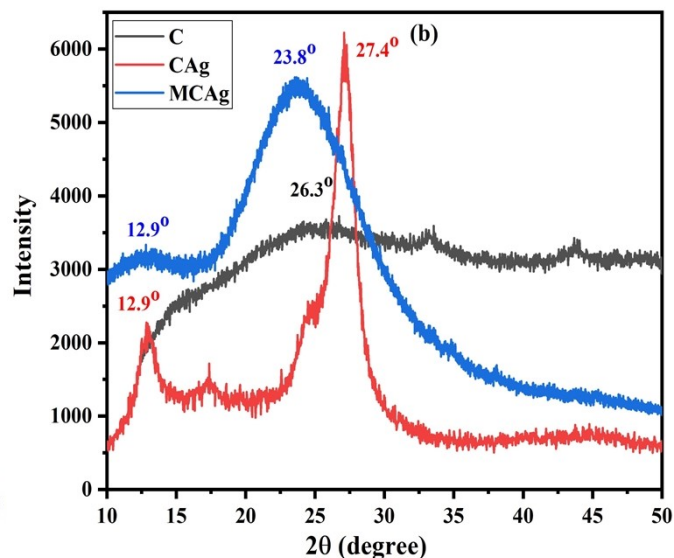

**Fig.S1.** Barrett-Joyner-Halenda (a) and XRD analysis (b) for C, CAg, and MCAg.

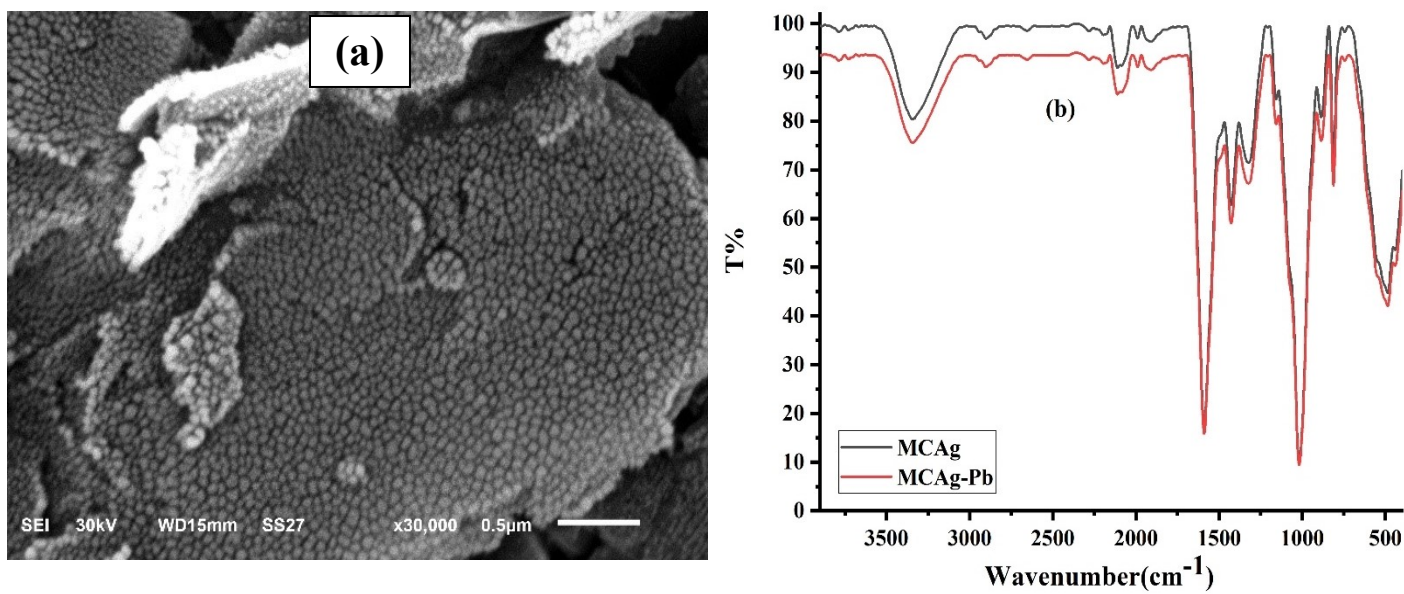

**Fig.S2:** SEM image(a) and ATR-FTIR (b) of CAg after ten cycles of reusability.

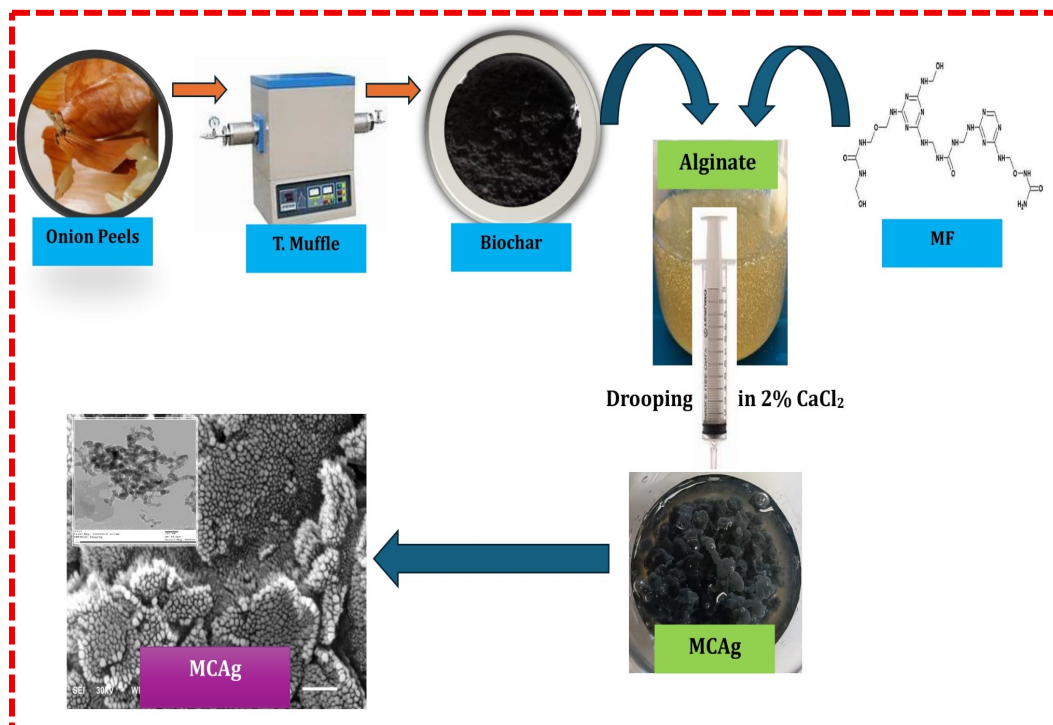

**Scheme S1.** Schematic representation of the synthesis process for the melamine-formaldehyde/biochar/alginate composite (MCAg).

#### **S1: Chemical composition of the simulated wastewater system**

The wastewater produced within an inorganic chemistry research laboratory is often a mixture of inorganic and organic species as a result of ordinary analytical and synthesis activities. Common inorganic cations include  $\text{Na}^+$ ,  $\text{K}^+$ ,  $\text{Ca}^{2+}$ ,  $\text{Mg}^{2+}$ , and  $\text{NH}_4^+$ , along with numerous transition-metal ions such as  $\text{Fe}^{2+}/\text{Fe}^{3+}$ ,  $\text{Cu}^{2+}$ ,  $\text{Zn}^{2+}$ ,  $\text{Pb}^{2+}$ ,  $\text{Cd}^{2+}$ ,  $\text{Mn}^{2+}$ ,  $\text{Ni}^{2+}$ , and  $\text{Co}^{2+}$  emerging from metal salt solutions, redox reactions, and precipitation experiments. Typical anions found in acid-base waste streams include  $\text{Cl}^-$ ,  $\text{NO}_3^-$ ,  $\text{SO}_4^{2-}$ ,  $\text{PO}_4^{3-}$ ,  $\text{CO}_3^{2-}/\text{HCO}_3^-$ , and residual  $\text{OH}^-$ . Such effluent is mostly inorganic, but it can also contain organic components such as ethanol, methanol, acetone, EDTA, organic acids (acetic, oxalic, and citric), amino ligands, and trace surfactants from reagent use, cleaning, or complexation investigations.

Unreacted acids and bases, metal hydroxide or carbonate precipitates, and suspended particles are also frequently found. Due to competition between coexisting ions, the formation of strong metal–ligand complexes, changes in ionic strength, and pH fluctuations that collectively affect metal speciation and adsorbent surface charge, this complex ionic matrix can produce significant interference effects during adsorption processes.
